# Supplementary material for: Effect of tomato variety, cultivation, climate and processing on Sola l 4, an allergen from Solanum lycopersicum
Source: PubMed Central journal article supplement (PMC6002116; doi:10.1371/journal.pone.0197971), 2018-06-14
Supplement: pone.0197971.s003.pdf [file pone.0197971.s003.pdf]

## Supporting information

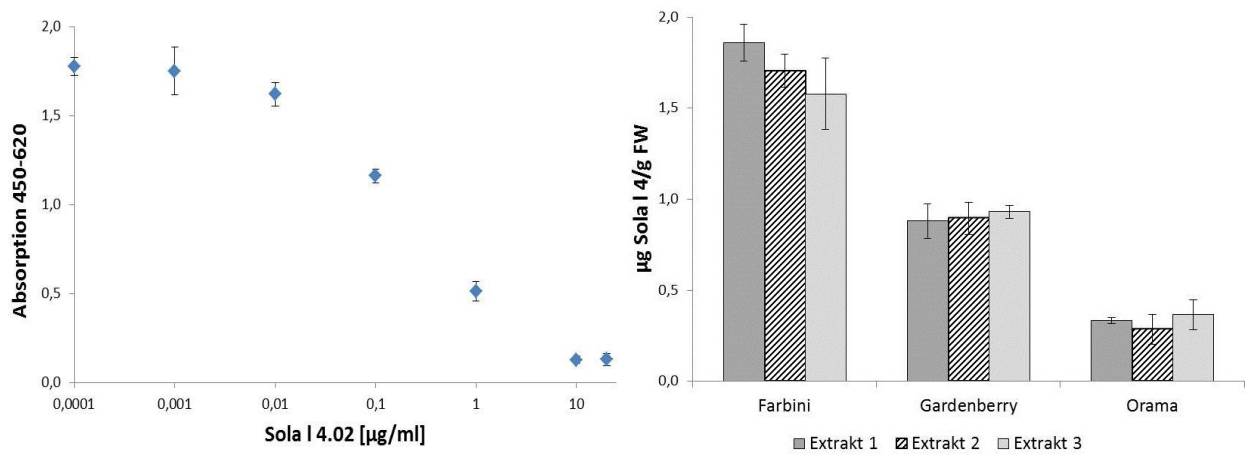

**S3 Fig. Indirect competitive ELISA and protein extraction.** (A) Standard curve of indirect competitive ELISA to quantify Sola 1 4 in tomato and (B) reproducibility of the protein extraction method exemplarily shown for cultivars Farbini, Gardenberry and Orama.
