# Supplementary material for: Effect of tomato variety, cultivation, climate and processing on Sola l 4, an allergen from Solanum lycopersicum
Source: PubMed Central journal article supplement (PMC6002116; doi:10.1371/journal.pone.0197971), 2018-06-14
Supplement: pone.0197971.s004.pdf [file pone.0197971.s004.pdf]

## Supporting information

**S1 Table. Tomato cultivars.** Sola l 4 content (mean values) in  $\mu\text{g/g}$  fresh weight (FW), total soluble protein in  $\mu\text{g/g}$  FW and percentage of Sola l 4/total soluble protein of different tomatoes.

Plants were grown at garden center Böck (Neufahrn, Munich).

| <b>cultivar</b> | <b>color</b>     | <b>Sola l 4<br/>[<math>\mu\text{g/g}</math> FW]</b> | <b>total soluble protein<br/>[<math>\mu\text{g/g}</math> FW]</b> | <b>% Sola l 4/total<br/>soluble protein</b> |
|-----------------|------------------|-----------------------------------------------------|------------------------------------------------------------------|---------------------------------------------|
| Indigo Rose     | green/black peel | $0.493 \pm 0.11$                                    | $291.1 \pm 19.2$                                                 | 0.169                                       |
| Limetto         | green            | $0.489 \pm 0.17$                                    | $144.1 \pm 10.2$                                                 | 0.339                                       |
| Skate           | yellow           | $1.363 \pm 0.20$                                    | $229.0 \pm 14.0$                                                 | 0.595                                       |
| Bambello        | orange           | $1.497 \pm 0.15$                                    | $584.0 \pm 19.9$                                                 | 0.256                                       |
| Farbini         | orange           | $1.714 \pm 0.19$                                    | $380.9 \pm 4.7$                                                  | 0.450                                       |
| 72-187 Operino  | orange           | $0.718 \pm 0.11$                                    | $423.3 \pm 21.1$                                                 | 0.170                                       |
| Orama           | orange           | $0.328 \pm 0.06$                                    | $292.1 \pm 9.0$                                                  | 0.112                                       |
| Sansibar        | orange           | $0.534 \pm 0.30$                                    | $298.3 \pm 3.7$                                                  | 0.179                                       |
| Rhianna         | rose             | $0.292 \pm 0.08$                                    | $113.5 \pm 13.3$                                                 | 0.257                                       |
| Camaraque       | red              | $0.698 \pm 0.16$                                    | $474.3 \pm 12.2$                                                 | 0.147                                       |
| Funtelle        | red              | $0.855 \pm 0.15$                                    | $291.8 \pm 9.3$                                                  | 0.293                                       |
| Gardenberry     | red              | $0.902 \pm 0.11$                                    | $318.3 \pm 6.0$                                                  | 0.283                                       |
| Idolini         | red              | $0.854 \pm 0.15$                                    | $411.6 \pm 19.8$                                                 | 0.207                                       |
| Mecano          | red              | $0.501 \pm 0.13$                                    | $313.4 \pm 14.1$                                                 | 0.160                                       |
| Messina         | red              | $0.384 \pm 0.16$                                    | $144.0 \pm 3.1$                                                  | 0.267                                       |
| Monterey        | red              | $1.065 \pm 0.14$                                    | $394.4 \pm 21.0$                                                 | 0.270                                       |
| Rugantino       | red              | $0.244 \pm 0.19$                                    | $259.7 \pm 10.0$                                                 | 0.094                                       |
| Seviocard       | red              | $0.337 \pm 0.22$                                    | $261.9 \pm 11.1$                                                 | 0.129                                       |
| Supersweet      | red              | $1.050 \pm 0.14$                                    | $159.5 \pm 7.1$                                                  | 0.658                                       |
| Tommagino       | red              | $0.535 \pm 0.15$                                    | $140.2 \pm 5.5$                                                  | 0.382                                       |
| TZ 4111         | red              | $0.551 \pm 0.13$                                    | $217.8 \pm 3.2$                                                  | 0.253                                       |
| Crispino Plum   | brown            | $1.067 \pm 0.14$                                    | $480.6 \pm 15.8$                                                 | 0.222                                       |
| Tiger           | brown/green      | $0.967 \pm 0.19$                                    | $295.7 \pm 20.5$                                                 | 0.327                                       |
